# Supplementary material
Source: PubMed Central journal article supplement (PMC9843258)
Supplement: mmc1.pdf [file mmc1.pdf]

**iScience, Volume 26**

**Supplemental information**

**Nonstructural protein 1 widespread**

**RNA decay phenotype varies among coronaviruses**

**Yahaira Bermudez, Jacob Miles, and Mandy Muller**

Figure S1.

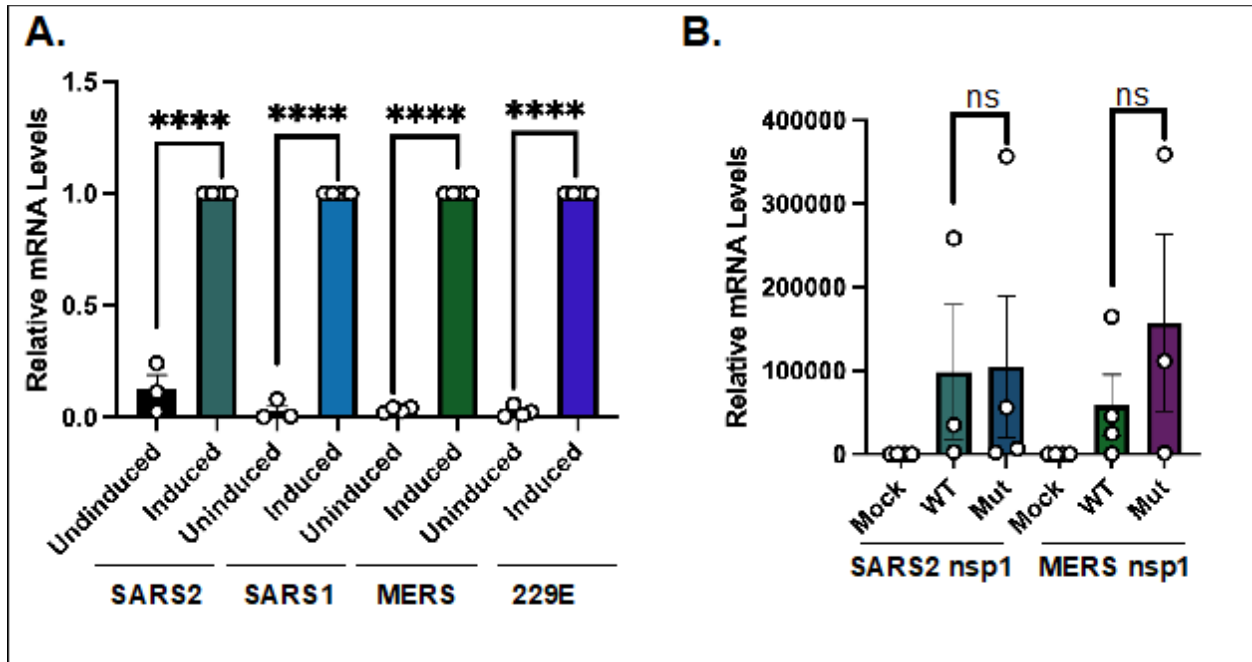

**Supplementary Figure 1. (A)** Transduced cells were induced with doxycycline for 24h (or left uninduced) as described above, total RNA was harvested and underwent RT-qPCR to measure expression of nsp1 as indicated. **(B)** 293T cells were transfected with the indicated WT or mutant nsp1 (or mock transfected as a control). 24h later, total RNA was harvest underwent RT-qPCR to measure expression of nsp1. n.s., not significant; \*\*, P < 0.01; \*\*\*, P < 0.001.

**Figure S2.**

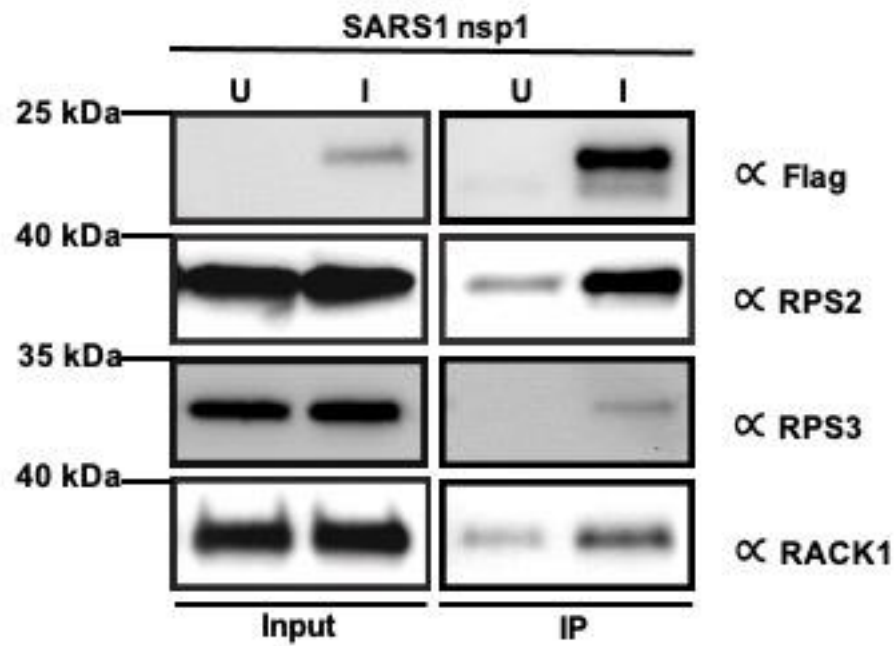

**Supplementary Figure 2.** SARS1 nsp1 transduced cells were induced with doxycycline for 24h (or left uninduced). Cells were then harvested, lysed, and co-IP performed using FLAG-tag affinity beads to pull on the Flag-tagged nsp1 protein.
